# Supplementary material
Source: PubMed Central journal article supplement (PMC8349839)
Supplement: NIHMS1720180-supplement-7.pdf [file NIHMS1720180-supplement-7.pdf]

Supplementary Table 2: Correlations between effect sizes of traits and tissues eQTLs for variants within the NNT gene. Related to figure 5.

| Trait (UK Biobank) <sup>£</sup>        | GTEx Single-Tissue eQTL, normalized effect size <sup>§</sup> |                                |
|----------------------------------------|--------------------------------------------------------------|--------------------------------|
|                                        | Skin - Not Sun Exposed (Suprapubic)                          | Skin - Sun Exposed (Lower leg) |
| Skin color (pigmentation) <sup>§</sup> | -0.686                                                       | -0.262                         |
| Sun protection use                     | -0.438                                                       | -0.848                         |
| Ease of skin tanning <sup>*</sup>      | -0.407                                                       | -0.839                         |

\* Following the Fitzpatrick's Skin phototypes' classification, higher values of this phenotype actually represent less tanning but easier burn.

£ Effect size from GWAS of these phenotypes.

§ The normalized effect size (NES) of the eQTLs is defined as the slope of the linear regression, and is computed as the effect of the alternative allele (ALT) relative to the reference allele (REF) (i.e., the eQTL effect allele is the ALT allele).

Supplementary Table 3: Oligonucleotides used for deletion of *nnt* gene in Zebrafish.

Related to the STAR Methods under “*Deletion of Zebrafish nnt gene*” subsection.

| . Related to REAGENT or RESOURCE                                                                                                                                | SOURCE                         | IDENTIFIER                                            |
|-----------------------------------------------------------------------------------------------------------------------------------------------------------------|--------------------------------|-------------------------------------------------------|
| Oligonucleotides (continued)                                                                                                                                    |                                |                                                       |
| pMiniCoopR U6: DR-NNT-1 spacer, mitfa:Cas9<br>DR-NNT-1 spacer sequence with 5' G: 5'-<br>GGGGCTACAATGTGCCCGGA-3'                                                | This manuscript                | KAC1684 - cloned<br>from Addgene<br>plasmid ID 118840 |
| pMiniCoopR U6: DR-NNT-2 spacer, mitfa:Cas9<br>DR-NNT-2 spacer sequence with 5' G: 5'-<br>GGTGGTGGTGGAGTCCGCG-3'                                                 | This manuscript                | KAC1700, cloned<br>from Addgene<br>plasmid ID 118840  |
| pMiniCoopR U6: DR-NNT-3 spacer, mitfa:Cas9<br>DR-NNT-3 spacer sequence with 5' G: 5'-<br>GGTTACCTGGACTAGTGAGG-3'                                                | This manuscript                | KAC1679, cloned<br>from Addgene<br>plasmid ID 118840  |
| P5 deep sequencing primer for Danio rerio DR-NNT-1:<br>5'-<br>ACACTCTTTCCCTACACGACGCTCTTCCGATCTCGG<br>TTGAGGGCTTGATGTGTCCTAAAG-3'                               | Integrated DNA<br>technologies | oKAC1374                                              |
| P7 deep sequencing primer for Danio rerio DR-NNT-1:<br>5'-<br>GACTGGAGTTCAGACGTGTGCTCTTCCGATCTCTCT<br>CTTTCACATGTAGGAGGAGGGC-3'                                 | Integrated DNA<br>technologies | oKAC1375                                              |
| P5 deep sequencing primer for Danio rerio DR-NNT-3:<br>5'-<br>ACACTCTTTCCCTACACGACGCTCTTCCGATCTCTA<br>CAATGTGCCCGGACGGTGAAG-3'                                  | Integrated DNA<br>technologies | oKAC1376                                              |
| P7 deep sequencing primer for Danio rerio DR-NNT-3:<br>5'-<br>GACTGGAGTTCAGACGTGTGCTCTTCCGATCTCCAT<br>ACTCAAGCTCTTCCGTTTAGTGTG-3'                               | Integrated DNA<br>technologies | oKAC1377                                              |
| P5 deep sequencing primer for Danio rerio DR-NNT-2:<br>5'-<br>ACACTCTTTCCCTACACGACGCTCTTCCGATCTCAT<br>CCTGACGTCCCTGATGGTGG-3'                                   | Integrated DNA<br>technologies | oKAC1378                                              |
| P7 deep sequencing primer for Danio rerio DR-NNT-2:<br>5'-<br>GACTGGAGTTCAGACGTGTGCTCTTCCGATCTGGCATTCCCT<br>TACAAACAGCTGACCGTC-3'                               | Integrated DNA<br>technologies | oKAC1379                                              |
| Nextera DNA index primer 701, for targeted sequencing<br>library preparation: 5'-<br>CAAGCAGAAGACGGCATAACGAGATTCGCCTTAGTG<br>ACTGGAGTTCAGACGTGTGCTCTTCCGATCT-3' | Integrated DNA<br>technologies | oKAC1379                                              |
| Nextera DNA index primer 702, for targeted sequencing<br>library preparation: 5'-<br>CAAGCAGAAGACGGCATAACGAGATCTAGTACGGTG<br>ACTGGAGTTCAGACGTGTGCTCTTCCGATCT-3' | Integrated DNA<br>technologies | oRW1093                                               |
| Nextera DNA index primer 703, for targeted sequencing<br>library preparation: 5'-<br>CAAGCAGAAGACGGCATAACGAGATTTCTGCCTGTG<br>ACTGGAGTTCAGACGTGTGCTCTTCCGATCT-3' | Integrated DNA<br>technologies | oRW1094                                               |

|                                                                                                                                                        |                             |         |
|--------------------------------------------------------------------------------------------------------------------------------------------------------|-----------------------------|---------|
| Nextera DNA index primer 704, for targeted sequencing library preparation: 5'-CAAGCAGAAGACGGCATAACGAGATGCTCAGGAGTGACTGGAGTTCAGACGTGTGCTCTTCCGATCT-3'   | Integrated DNA technologies | oRW1095 |
| Nextera DNA index primer 705, for targeted sequencing library preparation: 5'-CAAGCAGAAGACGGCATAACGAGATAGGAGTCCGTGACTGGAGTTCAGACGTGTGCTCTTCCGATCT-3'   | Integrated DNA technologies | oRW1096 |
| Nextera DNA index primer 706, for targeted sequencing library preparation: 5'-CAAGCAGAAGACGGCATAACGAGATCATGCCTAGTGACTGGAGTTCAGACGTGTGCTCTTCCGATCT-3'   | Integrated DNA technologies | oRW1097 |
| Nextera DNA index primer 707, for targeted sequencing library preparation: 5'-CAAGCAGAAGACGGCATAACGAGATGTAGAGAGGTGACTGGAGTTCAGACGTGTGCTCTTCCGATCT-3'   | Integrated DNA technologies | oRW1098 |
| Nextera DNA index primer 708, for targeted sequencing library preparation: 5'-CAAGCAGAAGACGGCATAACGAGATCCTCTCTGGTGACTGGAGTTCAGACGTGTGCTCTTCCGATCT-3'   | Integrated DNA technologies | oRW1099 |
| Nextera DNA index primer 709, for targeted sequencing library preparation: 5'-CAAGCAGAAGACGGCATAACGAGATAGCGTAGCGTGACTGGAGTTCAGACGTGTGCTCTTCCGATCT-3'   | Integrated DNA technologies | oRW1100 |
| Nextera DNA index primer 710, for targeted sequencing library preparation: 5'-CAAGCAGAAGACGGCATAACGAGATCAGCCTCGGTGACTGGAGTTCAGACGTGTGCTCTTCCGATCT-3'   | Integrated DNA technologies | oRW1101 |
| Nextera DNA index primer 711, for targeted sequencing library preparation: 5'-CAAGCAGAAGACGGCATAACGAGATTGCCTCTTGTGACTGGAGTTCAGACGTGTGCTCTTCCGATCT-3'   | Integrated DNA technologies | oRW1102 |
| Nextera DNA index primer 712, for targeted sequencing library preparation: 5'-CAAGCAGAAGACGGCATAACGAGATTCCTCTACGTGACTGGAGTTCAGACGTGTGCTCTTCCGATCT-3'   | Integrated DNA technologies | oRW1103 |
| Nextera DNA index primer 510, for targeted sequencing library preparation: 5'-AATGATACGGCGACCACCGAGATCTACACCGTCTAA TACTCTTTCCCTACACGACGCTCTTCCGATCT-3' | Integrated DNA technologies | oRW1124 |
| Nextera DNA index primer 511, for targeted sequencing library preparation: 5'-AATGATACGGCGACCACCGAGATCTACACTCTCTCC GACTCTTTCCCTACACGACGCTCTTCCGATCT-3' | Integrated DNA technologies | oRW1125 |
